# The Number of Resected Lymph Nodes (nLNs) Combined with Tumor Size as a Prognostic Factor in Patients with Pathologic N0 and Nx Non-Small Cell Lung Cancer

Miaomiao Yang<sup>1,2</sup>\*, Hongxin Cao<sup>1</sup>\*, Xi Guo<sup>3</sup>, Tiehong Zhang<sup>1</sup>, Pingping Hu<sup>1</sup>, Jiajun Du<sup>1\*</sup>, Qi Liu<sup>1\*</sup>

**1** Institute of Oncology, Provincial Hospital Affiliated to Shandong University, Shandong University, Jinan, P.R. China, **2** Department of Medical Oncology, Yantai Yuhuangding Hospital, Qingdao University School of Medicine, Yantai, P.R. China, **3** Department of Intensive Care Medicine, Qilu Hospital, Shandong University, Jinan, P.R. China

## Abstract

**Background:** The prognostic role of the number of resected lymph nodes (nLNs) in pathologic N0 (lymph node negative) and Nx (no lymph node examined) non-small cell lung cancer (NSCLC) patients remains uncertain. Guidelines for optimal nLNs have not been established. In the current study, we evaluated whether a higher number of resected lymph nodes (LNs) results in better survival in different tumor size categories among NSCLC patients without metastatic LNs.

**Method:** A retrospective study was conducted. Based on nLNs (LN=0, 1–7, >7) and tumor size ( $T_a$ :  $\leq 3.5$ cm,  $T_b$ :  $> 3.5$ cm) during surgery, patients were categorized into 6 groups (LN<sub>0</sub>T<sub>a</sub>, LN<sub>0</sub>T<sub>b</sub>, LN<sub>1–7</sub>T<sub>a</sub>, LN<sub>1–7</sub>T<sub>b</sub>, LN<sub>7</sub>-T<sub>a</sub> and LN<sub>7</sub>-T<sub>b</sub>). Survival and multivariate analyses were carried out to determine whether nLNs combined with tumor size was significant for overall survival (OS) or disease free survival (DFS) after adjusting for potential confounders.

**Results:** A total of 428 patients were enrolled in the study. Multivariate analysis demonstrated that nLNs, tumor size and pathological stage were the independent prognosticators for OS and DFS. Data from our study suggested that lung cancer lymphadenectomy with more than 7 LNs removed should be considered a benchmark for surgery or pathology at an early stage. Survival was significantly better in the LN<sub>7</sub>-T<sub>a</sub> group, compared with other 5 groups ( $p < 0.001$ ).

**Conclusions:** The combined predictor (nLNs combined with tumor size) is an independent prognostic factor and a reasonable stratification criterion in patients with pathologic N0 and Nx NSCLC. The validation of our finding is warranted in further investigation.

**Citation:** Yang M, Cao H, Guo X, Zhang T, Hu P, et al. (2013) The Number of Resected Lymph Nodes (nLNs) Combined with Tumor Size as a Prognostic Factor in Patients with Pathologic N0 and Nx Non-Small Cell Lung Cancer. PLoS ONE 8(9): e73220. doi:10.1371/journal.pone.0073220

**Editor:** Apar Kishor Ganti, University of Nebraska Medical Center, United States of America

**Received:** February 7, 2013; **Accepted:** July 18, 2013; **Published:** September 4, 2013

**Copyright:** © 2013 Yang et al. This is an open-access article distributed under the terms of the Creative Commons Attribution License, which permits unrestricted use, distribution, and reproduction in any medium, provided the original author and source are credited.

**Funding:** This study was supported by Provincial Science and Technology Development Planning of Shandong (2011GGH21819) and Provincial Science and Technology Development Planning of Shandong (2012G0021836). The funders had no role in study design, data collection and analysis, decision to publish, or preparation of the manuscript.

**Competing Interests:** The authors have declared that no competing interests exist.

\* E-mail: dujjajun@sdu.edu.cn (JD); liuqi66@sdu.edu.cn (QL)

† These authors contributed equally to this work.

## Introduction

Lung cancer retains the status of leading cause of cancer-related deaths in both men and women in the United States, with 159,480 estimated deaths in 2013 [1]. Despite optimal treatment, the 5-year overall survival rate (approximately 16%) of lung cancer has shown the least improvement compared with other cancers. Currently, lymph node status is regarded as a valid risk stratification tool and the most powerful prognostic factor for patients with lung cancer [2]. However, 44% of patients with pathological node negative (pN0) disease still die within 5 years.

Indeed, the therapeutic effect of the extent of lymph node (LN) dissection and the optimal number of examined lymph nodes (nLNs) during surgery in patients with non-small cell lung cancer (NSCLC) remains controversial [3–6]. Examining more LNs may eliminate micrometastatic lymph nodes, increase the likelihood of accurate staging and then influence the survival data [7]. Patients

who had no LNs examined, which termed ‘pathologic Nx’ (pNx), are often excluded to analyze the correlation between nLNs and outcomes. As these patients are often treated as pathologic N0 in clinical practice, they were comparative and have some commonalities on characteristics with pN0 patients.

Furthermore, tumor size has been directly related to cancer lethality and acted as a significant predictor of LN metastasis [8]. Within our dataset, both nLNs and tumor size have been taken into consideration in the NSCLC patients without metastatic lymph nodes. The goal of our study, therefore, was to evaluate the prognostic impact of nLNs combined with tumor size. To achieve the goal, we analyzed a series of 428 NSCLC patients who were surgically treated and identified as pN0 or pNx.

## Materials and Methods

### Patients

Clinical records and official pathological reports of the consecutive patients who underwent surgical resection for primary lung cancer at our institute between 2006 and 2009 were reviewed retrospectively. Surgery was performed by experienced surgeons in the same team.

The inclusion criteria were as follows: therapy by surgery and absence of positive LN in pathologic specimen. Patients who had small cell lung cancer, distant metastasis, preoperative chemotherapy or radiotherapy, concomitant double cancer, surgical margin status positive, died within one month and those with insufficient histological information were excluded from the study (Fig. 1).

Pathologic staging was carried out according to the current 7th edition of the TNM classification. Patients with T1N0M0, T2aN0M0, T2bN0M0, T3N0M0 and T4N0M0 tumors were identified as Stage IA, Stage IB, Stage IIA, Stage IIB and Stage IIIA respectively. The exclusion also applies to the stage IIIA

patients who have direct tumor extension and are different from true node negative patients.

Information regarding the potential prognostic factors (gender, age, smoking status, tumor location, histology, tumor size, nLNs, extent of resection, adjuvant chemotherapy, pathological stage, differentiation and visceral pleural invasion) were identified under consideration. All of our patients were treated according to National Comprehensive Cancer Network (NCCN) guidelines.

### Ethics Statement

All patients gave written informed consent for their information to be stored in the hospital database and used for research. Ethical approval was obtained from Provincial Hospital Affiliated to Shandong University ethics committee.

### Follow-up

Follow-up information was ascertained from all patients through medical records or telephone interviews with the patient, a relative, or the referring physicians [9]. The evaluation involved

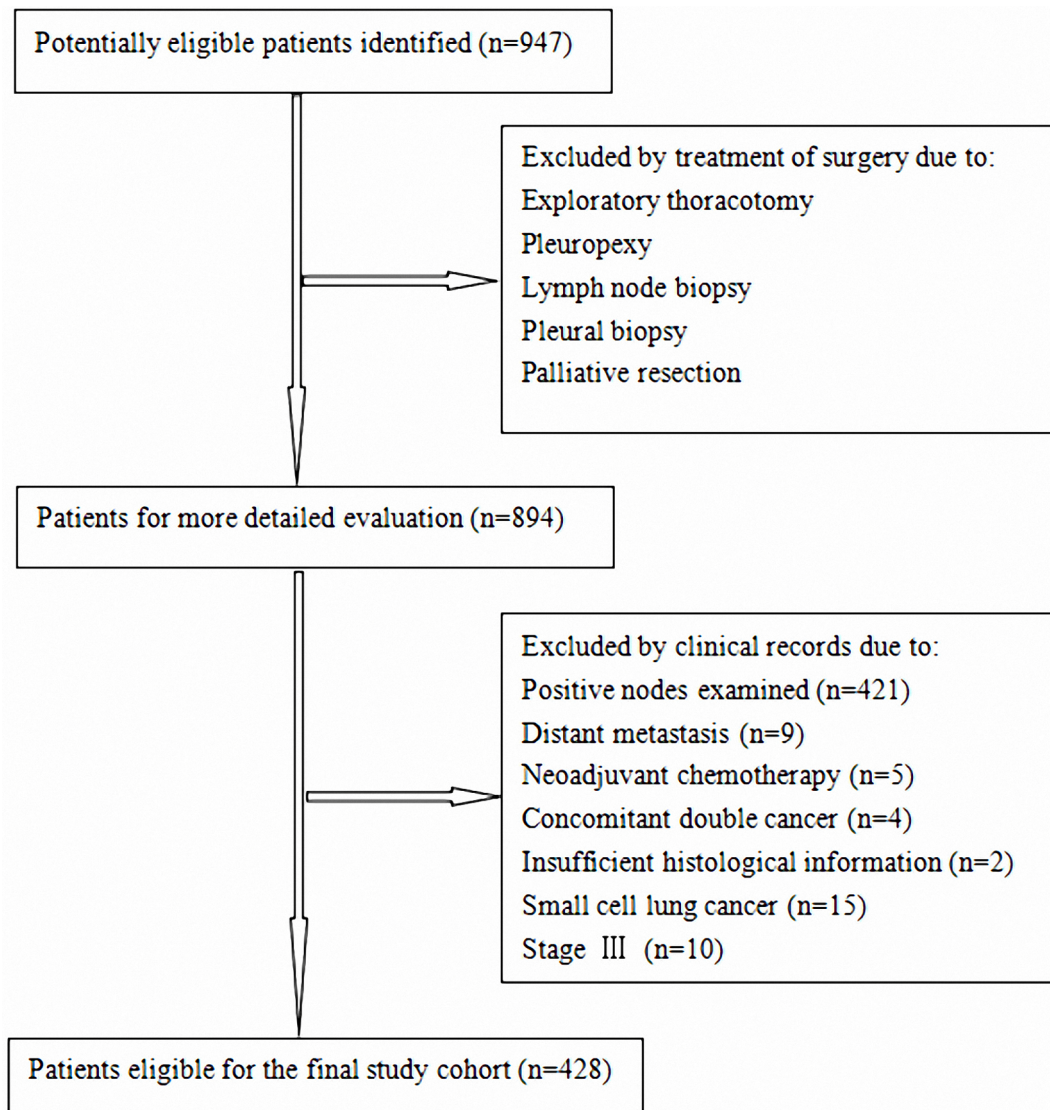

**Figure 1. Flow chart of the cohort selection.**

doi:10.1371/journal.pone.0073220.g001

**Table 1.** Patients' characteristics.

| Variable                  | Category           | No. of patients | %    |
|---------------------------|--------------------|-----------------|------|
| Gender                    | Male               | 293             | 68.5 |
|                           | Female             | 135             | 31.5 |
| Age (years)               | mean (range)       | 60.45(23–84)    |      |
|                           | ≤65                | 253             | 59.1 |
|                           | >65                | 175             | 40.9 |
| Smoking status            | Smoked             | 257             | 60.0 |
|                           | Never smoked       | 171             | 40.0 |
| Tumor location            | Left               | 178             | 41.6 |
|                           | Upper/lower        | 90/88           |      |
|                           | Right              | 250             | 58.4 |
|                           | Upper/middle/lower | 126/49/75       |      |
| Histology                 | Adenocarcinoma     | 234             | 54.7 |
|                           | Squamous cell      | 158             | 36.9 |
|                           | Other              | 36              | 8.4  |
| Tumor size (cm)           | mean (range)       | 3.55(0.3–11)    |      |
|                           | ≤3.5               | 267             | 62.4 |
|                           | >3.5               | 161             | 37.6 |
| Number of resected LNs    | mean (range)       | 13.18(0–61)     |      |
| Extent of resection       | Wedge resection    | 29              | 6.8  |
|                           | Segmentectomy      | 9               | 2.1  |
|                           | Lobectomy          | 341             | 79.7 |
|                           | Bilobectomy        | 34              | 7.9  |
|                           | Pneumonectomy      | 15              | 3.5  |
| Chemotherapy              | Yes                | 164             | 38.3 |
|                           | No                 | 264             | 61.7 |
| Pathological stage        | I                  | 335             | 78.3 |
|                           | II                 | 93              | 21.7 |
| Visceral pleural invasion | Yes                | 157             | 36.7 |
|                           | No                 | 271             | 63.3 |

doi:10.1371/journal.pone.0073220.t001

the followings: chest X-ray, chest CT scan, abdominal ultrasonography, blood examination including pertinent tumor markers, and brain magnetic resonance imaging or bone scintigraphy if necessary.

We chose overall survival (OS) and disease free survival (DFS) as endpoints and investigated the associations between the potential prognosticators and these endpoints. OS was calculated, in months, from the date of the definitive resection to the time of death, censoring or last follow-up. DFS was calculated, in months, from the date of the definitive resection to the date of recurrence or distant metastasis, censoring or last follow-up.

### Statistical Analysis

Statistical analysis was performed using the SPSS 18.0 statistical software package. Descriptive statistics were used to describe the characteristics of the study cohort. Survival analysis and curves were established using the Kaplan-Meier method and log-rank test was used for comparison. Stepwise Cox proportional hazards model was used to estimate hazard ratios (HRs) and 95% confidence intervals (95% CIs) for each variable [10]. Multivariate analysis was performed to evaluate any possible association between nLNs and survival after adjusting for other potential

confounders. As tumor size is a well-established independent prognostic factor [11], we particularly focused on the analyses stratified by nLNs combined with tumor size to compare survival among patients within the different groups. For nLNs and tumor size, the 'optimal' cutoff values were determined using  $\chi^2$  scores, which were calculated by means of maximally selected log-rank statistics [10]. P values of less than 0.05 in a two-tailed test were considered to be statistically significant. Receiver operating characteristics (ROC) curve analysis using patients with pathologic stage I was performed to confirm whether the cutoff value of nLNs was equally applicable to all subsets of patients.

## Results

### Patient Characteristics

A retrospective series of 428 patients (293 men, 135 women; median age 60 years, range 23–84 years) who underwent surgery for NSCLC was identified from the original files of Department of Thoracic Surgery of Shandong Provincial Hospital. The patients' characteristics were summarized in Table 1. The distribution of the number of lymph nodes in patients was shown in Fig. 2. Median number of resected nodes was 13 (range 0–61), with the median number of resected stations being 3 (range 0–7) (Table 2).

### Cutoff Values for the Number of Lymph Nodes and Tumor Size

Using the best cutoff approach by the maximally selected log-rank statistics [12], we identified 7 and 3.5cm as the optimal cutoff values for nLNs and tumor size respectively (Table 3). Unadjusted Kaplan-Meier curves stratifying patients according categorical nLNs and tumor size are shown in Fig. 3 and Fig. 4 respectively.

### Multivariate Analysis of Prognostic Factors

When all the prognostic factors were identified as categorical variables in the multivariate analysis (Table 4), nLNs, pathological stage and tumor size were independently prognostic for OS and DFS. Age and adjuvant chemotherapy had a significant impact on DFS instead of OS, while visceral pleural invasion showed a high discrimination power only for OS. In comparison with the baseline group (Nx), patients with 1 to 7 and >7 negative LNs had significantly better survival after adjusting for potential confounders ( $p < 0.001$  for OS and  $p = 0.001$  for DFS). Besides, tumor size ( $p = 0.024$ ), visceral pleural invasion ( $p = 0.006$ ) and pathological stage ( $p = 0.012$ ) were also associated with OS. Meanwhile, tumor size ( $p = 0.031$ ), pathological stage ( $p = 0.030$ ), age ( $p = 0.011$ ) and chemotherapy ( $p = 0.029$ ) were associated with DFS. Gender, smoking status, tumor location, histology and extent of resection were considerable factors in univariate analysis, but failed to attain predictive values in multivariate analysis. In addition, we found a statistically significant interaction between nLNs and tumor size ( $p = 0.001$ ), indicating that the survival advantage among patients with a higher number of negative LNs may be limited to tumor size.

### Survival and the Number of nLNs

Patients in our series were divided into three groups according to the total number of LNs: 0, 1–7, and more than 7 (Fig. 3). Data from our study suggested that patients with more than 7 LNs removed had better OS (HR: 0.206, 95%CI: 0.106–0.403,  $p = 0.000$ ) and DFS (HR: 0.366, 95%CI: 0.201–0.668,  $p = 0.001$ ). In addition to other established prognostic factors, the number of resected LNs was an independent prognostic factor in both univariate and multivariate analysis.

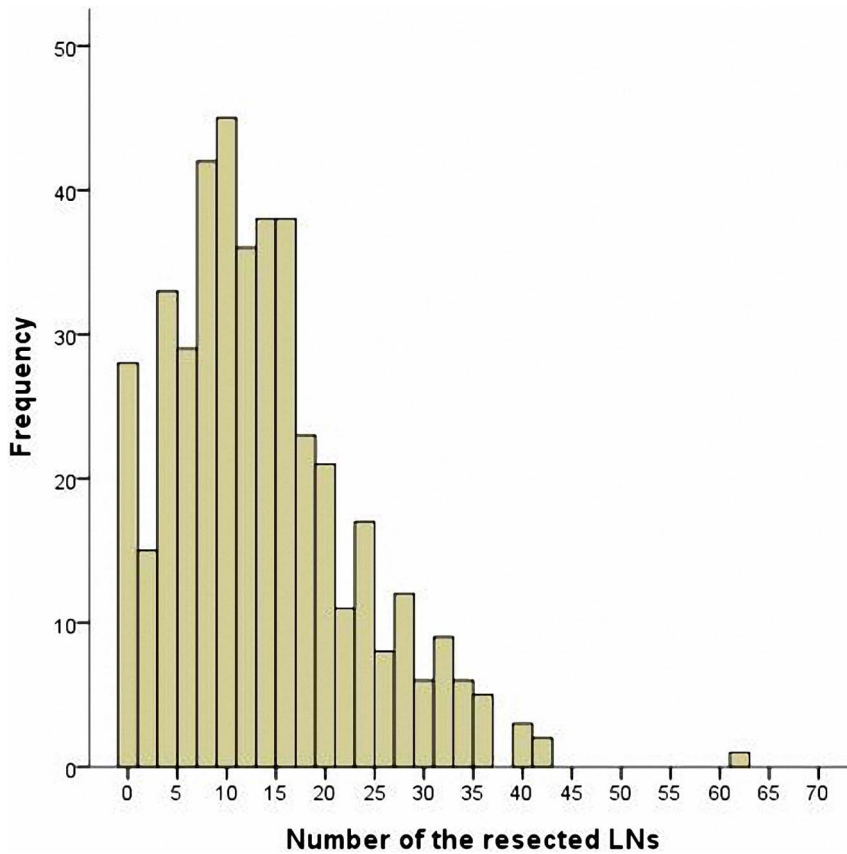

**Figure 2. Distribution of the number of resected lymph nodes.** doi:10.1371/journal.pone.0073220.g002

However, there was no statistically significant difference in survival (both OS and DFS) according to the model of 7 negative LNs in patients with pathological stage I (Fig. 5). The cutoff point with the highest sensitivity and specificity for estimating optimal negative LNs as a prognostic factor was set at 3 after ROC curve analysis (Fig. 6).

**Table 2. Resected LNs' characteristics.**

| Variable                     | Mean (range) | No. of patients | %    |
|------------------------------|--------------|-----------------|------|
| Total number of LNs resected | 13.18(0-61)  |                 |      |
| 0                            |              | 28              | 6.5  |
| 1-7                          |              | 100             | 23.4 |
| >7                           |              | 300             | 70.1 |
| N1 nodes resected            | 7.79(0-29)   |                 |      |
| N2 nodes resected            | 5.36(0-33)   |                 |      |
| Total resected LNs stations  | 2.65(0-7)    |                 |      |
| N1 station                   | 1.22(0-3)    |                 |      |
| N2 station                   | 1.44(0-5)    |                 |      |

doi:10.1371/journal.pone.0073220.t002

**Novel Predictor of Interest**

In order to be clear at a glance, tumor size less than or equal to 3.5cm was termed as 'T<sub>a</sub>' while tumor size more than 3.5cm was

**Table 3. Analysis of the number of resected lymph nodes and tumor size using the Cox proportional hazards model.**

| Cut-off value for lymph node number | Chi-square score | p     |
|-------------------------------------|------------------|-------|
| 0,1-5, >5                           | 15.423           | 0.000 |
| 0,1-6, >6                           | 16.485           | 0.000 |
| 0,1-7, >7                           | 17.477           | 0.000 |
| 0,1-8, >8                           | 14.183           | 0.001 |
| 0,1-9, >9                           | 13.455           | 0.001 |
| Cut-off value for tumor size        | Chi-square score | p     |
| ≤2, >2                              | 7.032            | 0.008 |
| ≤2.5, >2.5                          | 11.781           | 0.001 |
| ≤3, >3                              | 11.372           | 0.001 |
| ≤3.5, >3.5                          | 20.689           | 0.000 |
| ≤4, >4                              | 17.324           | 0.000 |
| ≤4.5, >4.5                          | 15.132           | 0.000 |
| ≤5, >5                              | 16.308           | 0.000 |

doi:10.1371/journal.pone.0073220.t003

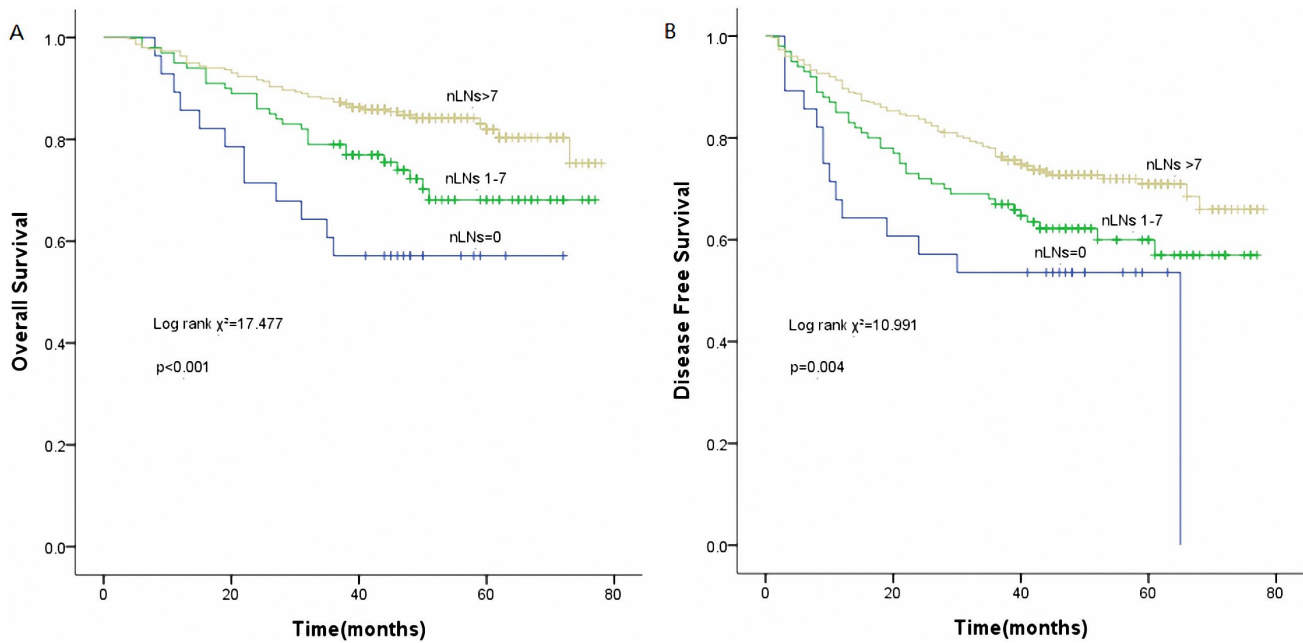

**Figure 3. Survival curves of the number of resected lymph nodes (nLNs).** (A) Overall survival curves of nLNs ( $p<0.001$ ). (B) Disease free survival curves of nLNs ( $p=0.004$ ). doi:10.1371/journal.pone.0073220.g003

termed as ‘T<sub>b</sub>’. We classified the patients into 6 categories based on a combination of nLNs and tumor size as follows: LN<sub>0</sub>T<sub>a</sub>, LN<sub>0</sub>T<sub>b</sub>, LN<sub>1-7</sub>T<sub>a</sub>, LN<sub>1-7</sub>T<sub>b</sub>, LN<sub>7</sub>T<sub>a</sub> and LN<sub>7</sub>T<sub>b</sub>. On multivariate analysis, the derived indicator was an independent prognostic factor for OS ( $p<0.001$ ) as well as DFS ( $p<0.001$ ). Fig. 7 has shown the survival curves of the new indicator. The distribution of the survival curves shows the survival benefit (both for OS and DFS) in proper order as follows: LN<sub>7</sub>T<sub>a</sub>, LN<sub>1-7</sub>T<sub>a</sub>, LN<sub>7</sub>T<sub>b</sub>,

LN<sub>0</sub>T<sub>a</sub>, LN<sub>1-7</sub>T<sub>b</sub>, and LN<sub>0</sub>T<sub>b</sub>. Among them, LN<sub>7</sub>T<sub>a</sub> group had the most statistically significant OS (HR: 0.444, 95%CI: 0.251–0.785,  $p=0.005$ ) and DFS (HR: 0.550, 95%CI: 0.358–0.844,  $p=0.006$ ) benefit.

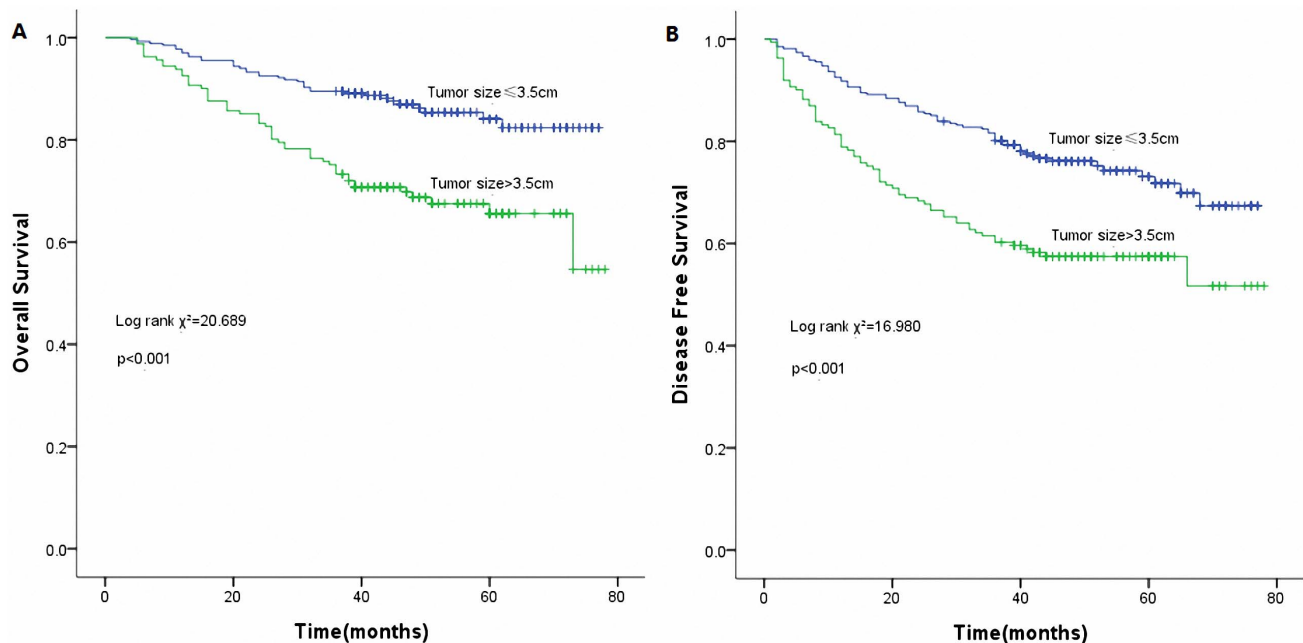

**Figure 4. Survival curves of tumor size.** (A) Overall survival curves of tumor size ( $p<0.001$ ). (B) Disease free survival curves of tumor size ( $p<0.001$ ). doi:10.1371/journal.pone.0073220.g004



**Table 4.** Independent prognostic factor for OS and DFS by multivariate Cox regression analysis for the entire cohort of patients (n = 428).

| Variable                  | OS                 |       | DFS                |       |
|---------------------------|--------------------|-------|--------------------|-------|
|                           | HR (95%CI)         | p     | HR (95%CI)         | p     |
| nLNs                      |                    | 0.000 |                    | 0.001 |
| 0                         | 1                  |       | 1                  |       |
| 1–7                       | 0.489(0.245–0.977) |       | 0.632(0.337–1.184) |       |
| >7                        | 0.206(0.106–0.403) |       | 0.366(0.201–0.668) |       |
| Pathological stage        | 2.000(1.165–3.435) | 0.012 | 1.647(1.050–2.581) | 0.030 |
| Tumor size (cm)*          | 1.867(1.085–3.212) | 0.024 | 1.587(1.042–2.417) | 0.031 |
| Visceral pleural invasion | 1.841(1.189–2.851) | 0.006 | NS                 |       |
| Age*                      | NS                 |       | 1.568(1.110–2.214) | 0.011 |
| Chemotherapy              | NS                 |       | 1.483(1.041–2.112) | 0.029 |

OS, overall survival; DFS, disease-free survival; HR, hazard ratio; 95% CI, 95% confidence interval; p, p-value; NS, not significant; nLNs, the number of resected lymph nodes; \*variables, considering 65 as age cutoff and 3.5cm as cutoff for nLNs.  
doi:10.1371/journal.pone.0073220.t004

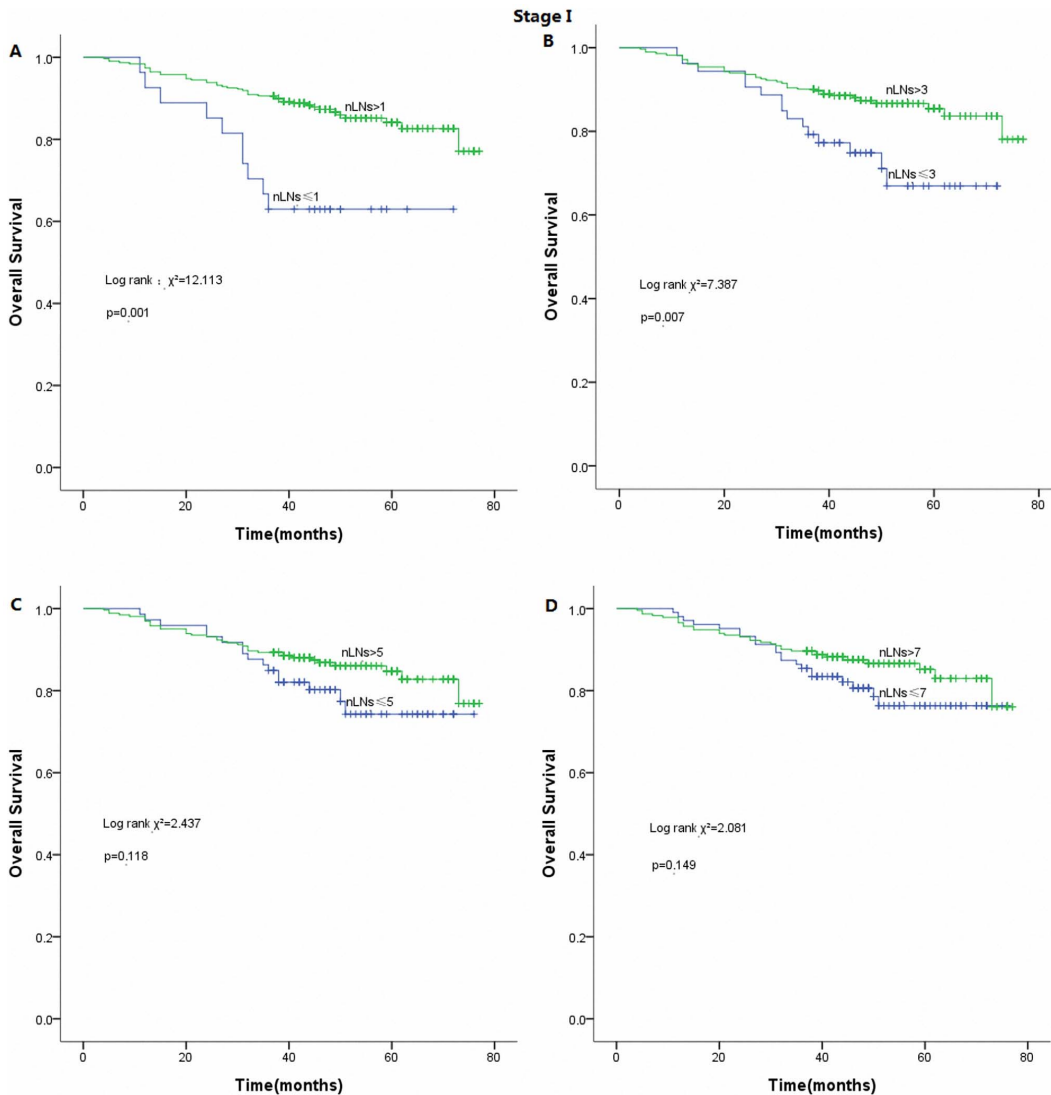

**Figure 5.** Survival curves of the number of resected lymph nodes (nLNs) in patients with stage I. (A) 1 resected LN as cutoff ( $p = 0.001$ ). (B) 3 resected LNs as cutoff ( $p = 0.007$ ). (C) 5 resected LNs as cutoff ( $p > 0.05$ ). (D) 7 resected LNs as cutoff ( $p > 0.05$ ).  
doi:10.1371/journal.pone.0073220.g005

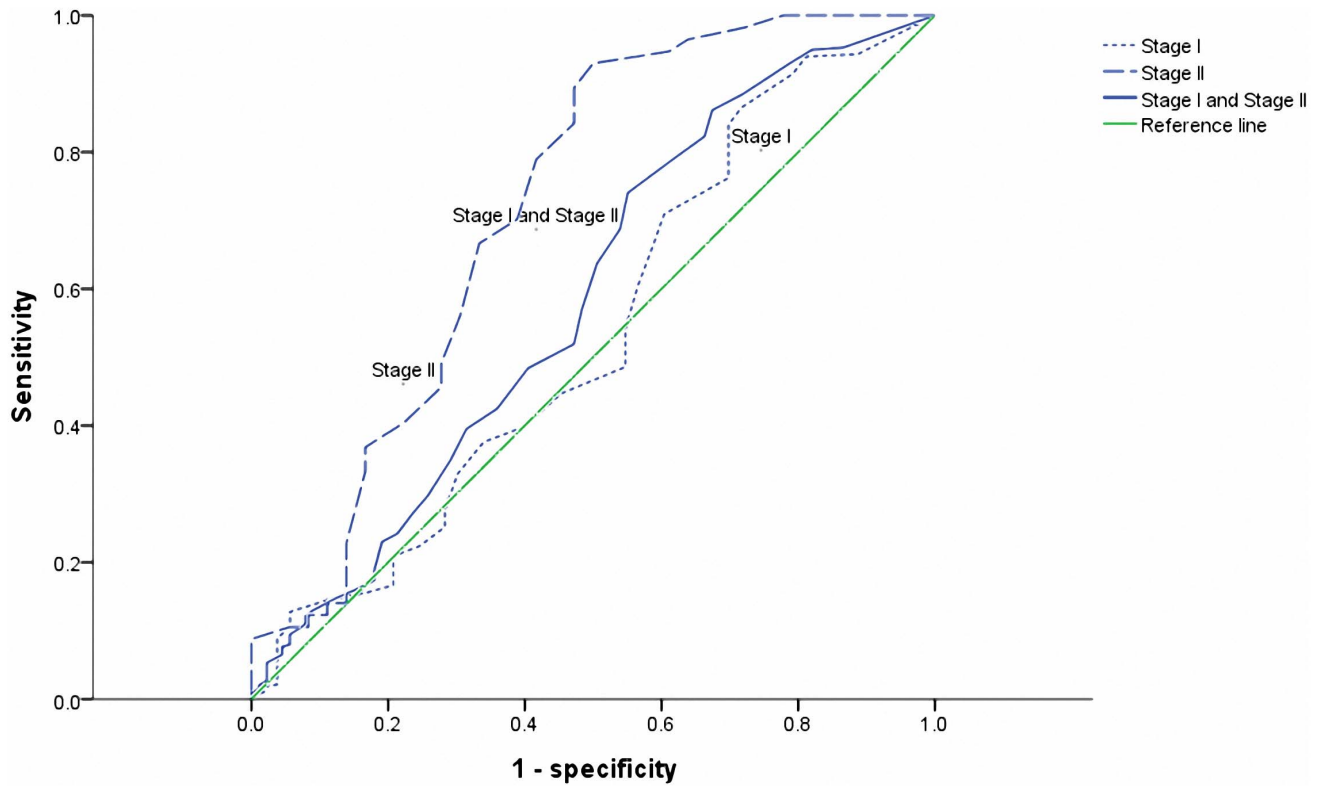

**Figure 6. Receiver operating characteristics analysis based on the model of 7 resected lymph nodes in Stage I, Stage II and Stage I and Stage II results with OS as end point.** In this model, the area under the curve (AUC) was 0.537, 0.586 and 0.719, respectively.  
doi:10.1371/journal.pone.0073220.g006

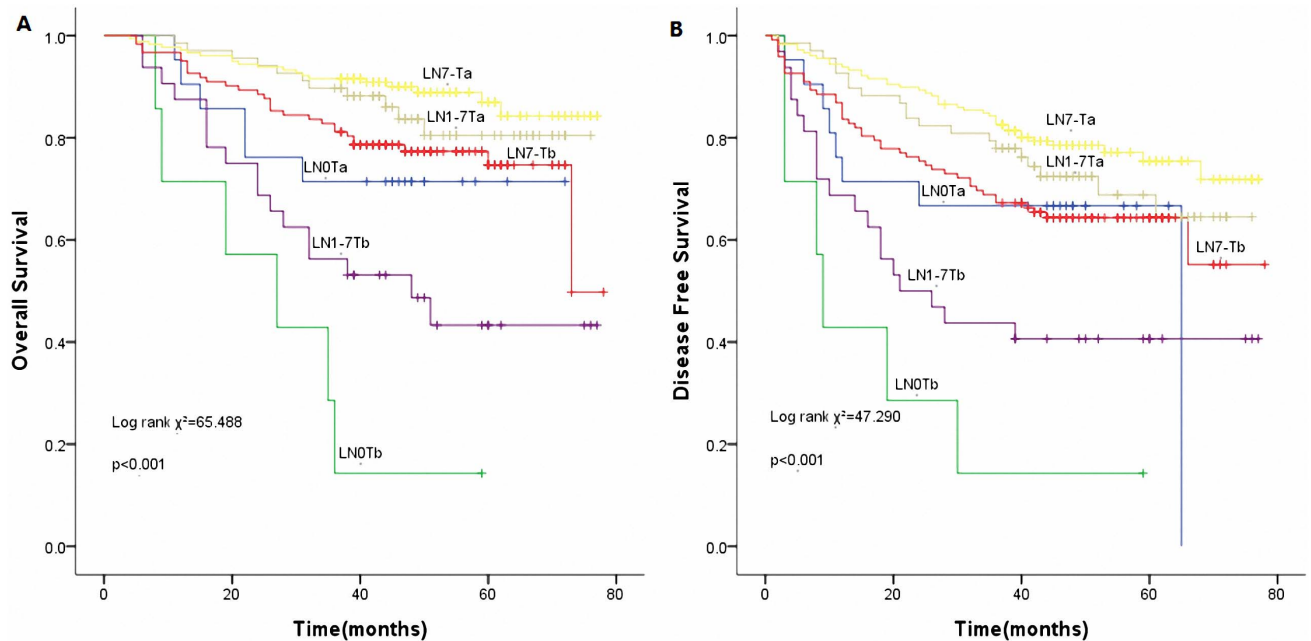

**Figure 7. Survival curves of the new predictor (nLNs combined with tumor size).** (A) Overall survival curves of the new predictor ( $p < 0.001$ ). (B) Disease free survival curves of the new predictor ( $p < 0.001$ ).  
doi:10.1371/journal.pone.0073220.g007

## Discussion

Here we report on the prognostic value of nLNs combined with tumor size in a series of surgically treated NSCLC patients. This information towards a better prognostication is worthy to help identify patients who would be candidates for more aggressive treatment or not [13], and stratify patients for clinical trials.

The NCCN guidelines recommend that ‘N1 and N2 node resection and mapping (ATS map)(minimum of three N2 stations sampled or complete lymph-node dissection)’ should be performed. Although serving consistently as a guide for therapy in clinical practice, pathologic nodal staging of lung cancer is often very poor. When remnant lung resection specimens were re-dissected after completion of pathology report, lymph nodes discarded were 1.5 times more than examined and 12% of pathologic node-negative patients had discarded metastatic lymph nodes [14]. These cases may introduce much uncertainty into pathologic nodal staging.

nLNs has been defined as a high risk factor in patients with lung cancer [10]. However, as current guidelines have not established an optimal surgical strategy with regard to nLNs. Its prognostic value and the minimum number of LNs to be examined are contentious issues. Several studies suggested that 11 to 16 was the optimal number of removed LNs to assess stage I lung cancer [5,15]. Saji H et al. identified retrieval of 10 or more LNs may be warranted for evaluation of nodal status though there was no significant difference in survival for stage I patients [16]. They concluded that patients with 10 or more LNs had significantly worse outcomes than those with less than 10 LNs without considering nodal status. A recent report at ASCO Annual Meeting on the prognostic impact of nLNs in pN0 NSCLC demonstrated that examining 8 or more LNs improved survival [17]. Nevertheless, the variability of results maybe due to the heterogeneous populations conducted in the studies.

Our results suggested that without considering the stage, patients undergoing surgery for NSCLC should have at least 7 LNs removed. By further refinement, the model of 7 negative LNs was not statistically significant for the survival in patients with pathological stage I. However, the survival curves indicated that there still exists a better prognostic trend for patients with more than 7 LNs resected. The ROC curve analysis indicated that at least 3 LNs examined may be optimal for stage I NSCLC patients in our series. As less LNs in patients with small tumor size or early stage are tend to be examined, the therapeutic benefit is quite modest for this subset of patients. The alternative explanation is that it is less likely to harbor micrometastatic LNs. Furthermore, our work also showed that examining 7 negative LNs in stage II was more significant than in stage I, which suggested that the survival advantage in patients with a higher number of negative LNs may be limited to tumor size or visceral pleural invasion. It may be partly account for a possibility that tumors with large size and involved pleura rubbing contribute to cancer cell exfoliation and further lead to tumor recurrence and metastasis.

T stage and nLNs have been identified to stratify patients with pathologic N0 and Nx NSCLC [18]. Within our dataset, both nLNs and tumor size are demonstrated to be major independent prognostic factors for OS and DFS. Moreover, nLNs is closely associated with tumor size. The novel predictor (nLNs combined with tumor size) has a powerful discriminative ability regarding the prognosis of lung cancer (Fig. 7). Furthermore, as Fig. 7 shows, a clear tendency towards the improvement of OS and DFS from LN<sub>0</sub> to LN<sub>7</sub>. in the same tumor size category was observed. The removal of more than 7 LNs during surgery improved survival in

lung cancer patients, particularly those with tumor size of less than 3.5cm. In this respect, nLNs in lung cancer has been proven to bear a prognostic potential, similar to that in other cancer types such as colon, breast, esophagus and gastric cancer [12,13,19,20].

The most potential explanation for the association between nLNs and survival is stage migration. Patients categorized as node-negative may have had cancer disseminated to regional LNs. Hence, as the number of removed LNs increases during surgery, the probability of harboring micrometastatic LNs decreases and so does the proportion of stage migration, which is known as the Will Rogers phenomenon [21]. Additional immunohistochemical techniques to conventional ones may increase nLNs micrometastases found [7].

It is also worth mentioning that previous studies have shed light on the prognostic role of the number of positive LNs in lung cancer [9,16,22]. For patients in our institute, we have previously reported that more than 5 positive LNs removed and more advanced pN staging led to worse OS and DFS ( $p < 0.0001$ ) [9]. In Fukui et al.’s study, the survival curves showed significant stepwise deterioration as the number of positive LNs increased. The 5-year survival of patients with seven or more positive LNs was significantly the worst compared to those with 4–6, 1–3 or 0 positive LNs [22]. As the number of positive LNs has been extensively studied, it may provide additional information for the pN categories of the TNM classification. Wei S et al. suggested that staging by MLN were more accurate than the current pN stage which was based on anatomical location [23]. However, the benefits of the number of positive LNs were not available for treatment options during preoperative evaluation. Further insight into the role of the number of positive LNs in clinical application will depend on the prospects for development of imaging studies.

When interpreting the results of the current analysis, it is also important to consider the limitations of this study. First, it is a retrospective and single-institution analysis with a moderate sample size. Second, the definition of the optimal cutoff values of nLNs and tumor size needs to be further explored. Third, there is considerable practice variability among surgeons and pathologists, which may lead to discarded nodes in the operative specimen. Besides, nodal tissues may be divided into a few fragments or difficult to separate from the ‘en bloc’ dissected tissues. That is to say, it is possible that the true number of LNs examined may have been underestimated.

In conclusion, our study indicated that the total number of resected lymph nodes and tumor size are clinically important. It seems that nLNs combined with tumor size is an important independent predictor for survival in N0 and Nx patients with non-small cell lung cancer. We believe that the relatively simple, clinically-based, novel predictor may have a considerable impact on surgical resection. However, the discrimination power, potential mechanisms and performance for clinical practice should be validated in further large-scale cohort studies.

## Acknowledgments

We are indebted to all the members of our lab for helpful comments and discussions.

## Author Contributions

Conceived and designed the experiments: MY TZ JD QL. Performed the experiments: MY HC PH. Analyzed the data: MY HC GX. Contributed reagents/materials/analysis tools: MY HC XG TZ PH. Wrote the paper: MY HC TZ PH JD QL.



## References

- Siegel R, Naishadham D, Jemal A (2013) Cancer statistics, 2013. *CA: A Cancer Journal for Clinicians* 63: 11–30.
- Osarogiagbon RU (2012) Predicting survival of patients with resectable non-small cell lung cancer: Beyond TNM. *Journal of Thoracic Disease* 4: 214.
- Ou S-HI, Zell JA (2008) Prognostic significance of the number of lymph nodes removed at lobectomy in stage IA non-small cell lung cancer. *Journal of Thoracic Oncology* 3: 880–886.
- Wu Y-C, Lin C-FJ, Hsu W-H, Huang B-S, Huang M-H, et al. (2003) Long-term results of pathological stage I non-small cell lung cancer: validation of using the number of totally removed lymph nodes as a staging control. *European journal of cardio-thoracic surgery* 24: 994–1001.
- Ludwig MS, Goodman M, Miller DL, Johnstone PA (2005) Postoperative survival and the number of lymph nodes sampled during resection of node-negative non-small cell lung cancer. *CHEST Journal* 128: 1545–1550.
- Xu F, Qi L, Yue D, Wang C (2012) The Effect of the Extent of Lymph Node Dissection for Stage IA Non-Small-Cell Lung Cancer on Patient Disease-Free Survival. *Clinical lung cancer*.
- Rusch VW, Hawes D, Decker PA, Martin SE, Abati A, et al. (2011) Occult Metastases in Lymph Nodes Predict Survival in Resectable Non-Small-Cell Lung Cancer: Report of the ACOSOG Z0040 Trial. *Journal of Clinical Oncology* 29: 4313–4319.
- Veeramachani NK, Battafarano RJ, Meyers BF, Zoole JB, Patterson GA (2008) Risk factors for occult nodal metastasis in clinical T1N0 lung cancer: a negative impact on survival. *European Journal of Cardio-Thoracic Surgery* 33: 466–469.
- Qiu C, Dong W, Su B, Liu Q, Du J (2013) The Prognostic Value of Ratio-Based Lymph Node Staging in Resected Non-Small-Cell Lung Cancer. *Journal of Thoracic Oncology* 8: 429–435.
- Bria E, Milella M, Sperduti I, Alessandrini G, Visca P, et al. (2009) A novel clinical prognostic score incorporating the number of resected lymph-nodes to predict recurrence and survival in non-small-cell lung cancer. *Lung Cancer* 66: 365–371.
- Agarwal M, Brahmanday G, Chmielewski GW, Welsh RJ, Ravikrishnan K (2010) Age, tumor size, type of surgery, and gender predict survival in early stage (stage I and II) non-small cell lung cancer after surgical resection. *Lung Cancer* 68: 398–402.
- Xu D, Huang Y, Geng Q, Guan Y, Li Y, et al. (2012) Effect of lymph node number on survival of patients with lymph node-negative gastric cancer according to the 7th edition UICC TNM system. *PLoS One* 7: e38681.
- Mersin H, Yildirim E, Bulut H, Berberoğlu U (2003) The prognostic significance of total lymph node number in patients with axillary lymph node-negative breast cancer. *European Journal of Surgical Oncology (EJSO)* 29: 132–138.
- Ramirez RA, Wang CG, Miller LE, Adair CA, Berry A, et al. (2012) Incomplete intrapulmonary lymph node retrieval after routine pathologic examination of resected lung cancer. *Journal of Clinical Oncology* 30: 2823–2828.
- Varlotto JM, Recht A, Nikolov M, Flickinger JC, DeCamp MM (2009) Extent of lymphadenectomy and outcome for patients with stage I nonsmall cell lung cancer. *Cancer* 115: 851–858.
- Saji H, Tsuboi M, Yoshida K, Kato Y, Nomura M, et al. (2011) Prognostic impact of number of resected and involved lymph nodes at complete resection on survival in non-small cell lung cancer. *Journal of Thoracic Oncology* 6: 1865–1871.
- Obiageli Uchenna Ogbata, Xinhua Yu, Raymond U Osarogiagbon. (2012) Prognostic impact of the number of examined lymph nodes (LNs) in resected node negative (pNo) non-small cell lung cancer (NSCLC). 2012 ASCO Annual Meeting.
- Osarogiagbon RU, Allen JW, Farooq A, Berry A, Spencer D, et al. (2010) Outcome of surgical resection for pathologic N0 and Nx non-small cell lung cancer. *Journal of Thoracic Oncology* 5: 191–196.
- Greenstein AJ, Litle VR, Swanson SJ, Divino CM, Packer S, et al. (2008) Effect of the number of lymph nodes sampled on postoperative survival of lymph node-negative esophageal cancer. *Cancer* 112: 1239–1246.
- Johnson PM, Porter GA, Ricciardi R, Baxter NN (2006) Increasing negative lymph node count is independently associated with improved long-term survival in stage IIIB and IIIC colon cancer. *Journal of clinical oncology* 24: 3570–3575.
- Feinstein AR, Sosin DM, Wells CK (1985) The Will Rogers phenomenon. Stage migration and new diagnostic techniques as a source of misleading statistics for survival in cancer. *The New England journal of medicine* 312: 1604.
- Fukui T, Mori S, Yokoi K, Mitsudomi T (2006) Significance of the number of positive lymph nodes in resected non-small cell lung cancer. *Journal of Thoracic Oncology* 1: 120–125.
- Wei S, Asamura H, Kawachi R, Sakurai H, Watanabe S-i (2011) Which is the better prognostic factor for resected non-small cell lung cancer: the number of metastatic lymph nodes or the currently used nodal stage classification? *Journal of Thoracic Oncology* 6: 310–318.
